# Supplementary material for: Edible Films from Carrageenan/Orange Essential Oil/Trehalose—Structure, Optical Properties, and Antimicrobial Activity
Source: MDPI journal article supplement (doi:10.3390/polym13030332), 2021-01-21
Supplement: s1 [file s1]

Supplementary material

# Edible films from carrageenan/orange essential oil/trehalose – structure, optical properties, and antimicrobial activity

Jancikova Simona <sup>1\*</sup>, Dordevic Dani<sup>1</sup>, Sedlacek Petr<sup>2</sup>, Nejezchlebova Marcela<sup>3</sup>, Tremel Jakub<sup>3</sup> and Tremlova Bohuslava<sup>1</sup>

<sup>1</sup> Department of Vegetable Foodstuffs Hygiene and Technology, Faculty of Veterinary Hygiene and Ecology, University of Veterinary and Pharmaceutical Sciences Brno, Palackeho tr. 1946/1, 612 42 Brno, Czech Republic; [jancikovas@vfu.cz](mailto:jancikovas@vfu.cz) (S.J.); [dordevicd@vfu.cz](mailto:dordevicd@vfu.cz) (D.D.); [tremlovab@vfu.cz](mailto:tremlovab@vfu.cz) (B.T.)

<sup>2</sup> Faculty of Chemistry, Brno University of Technology, Purkynova 118, 612 00 Brno, Czech Republic

<sup>3</sup> Department of Molecular Pharmacy, Faculty of Pharmacy, Masaryk University, Palackeho tr. 1946/1, 612 00 Brno, Czech Republic

\* Correspondence: [jancikovas@vfu.cz](mailto:jancikovas@vfu.cz); Tel.: +420 774 607 936

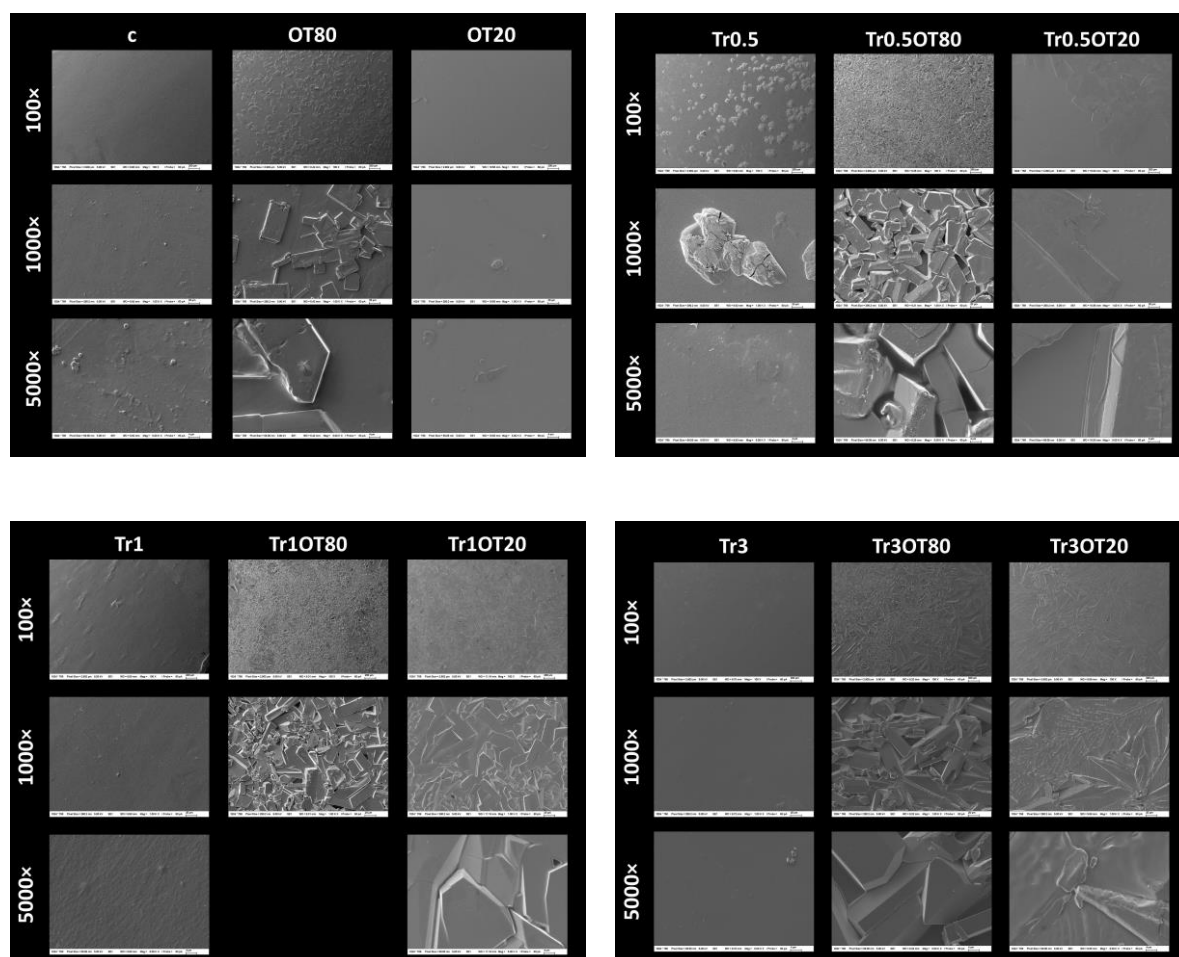

**Figure S1:** The appearance of films consisted of 0.5 g of  $\kappa$ -carrageenan

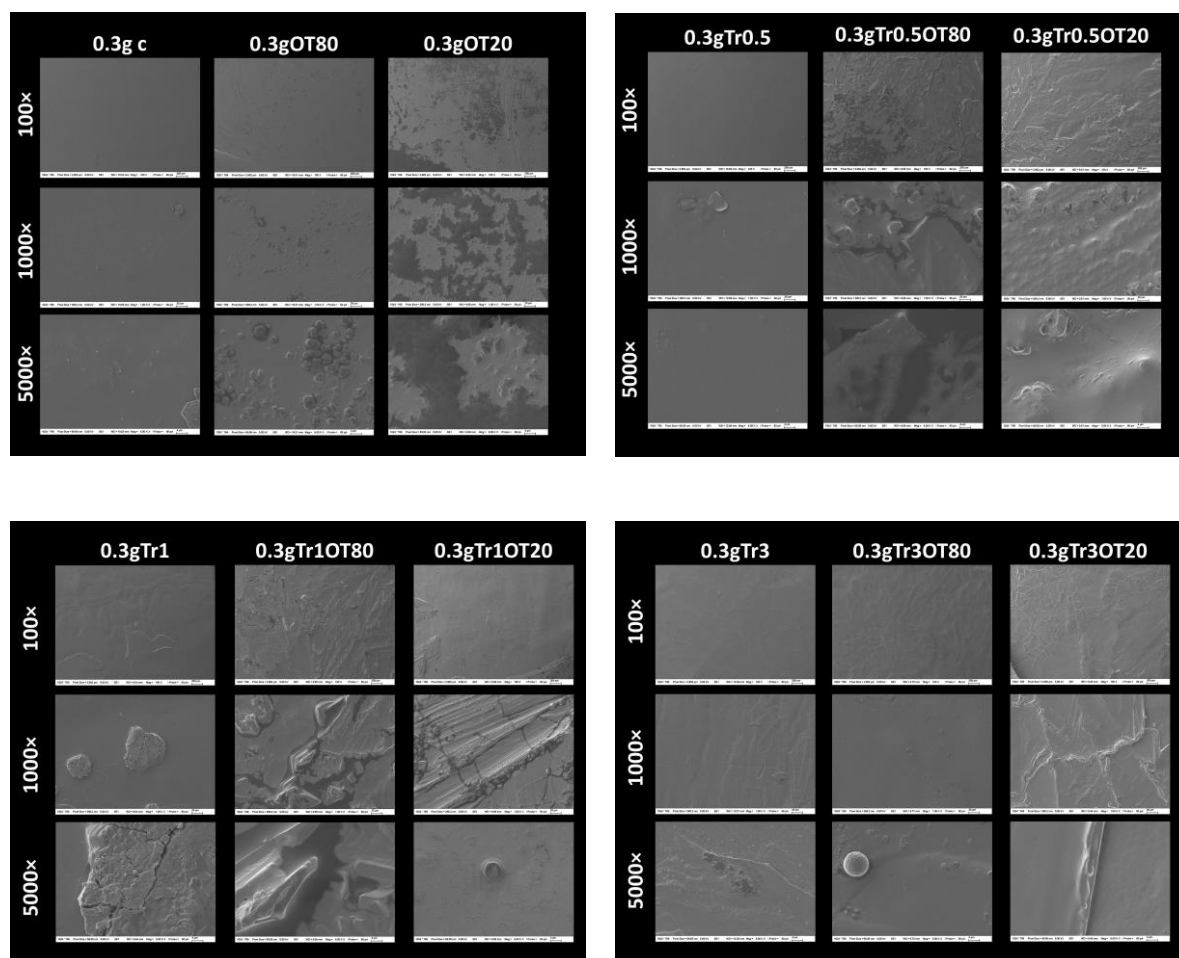

**Figure S2.** The appearance of films consisted of 0.3 g of κ-carrageenan

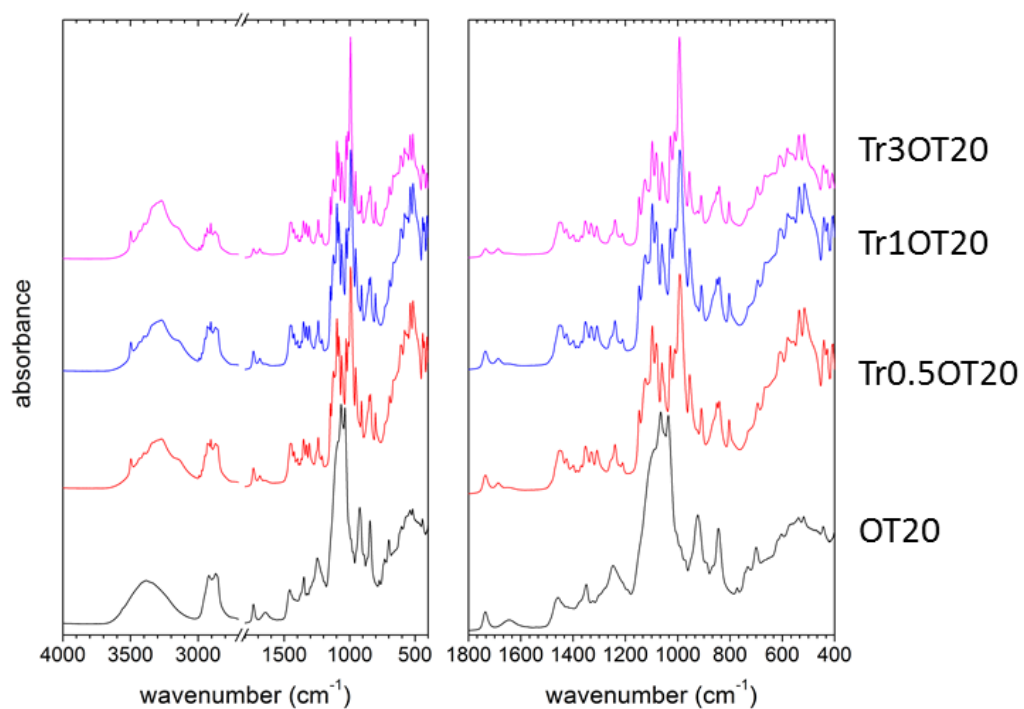

**Figure S3.** ATR FTIR spectra of the trehalose-containing carrageenan films with the addition of essential oil (0.5 g of carrageenan, Tween 20)

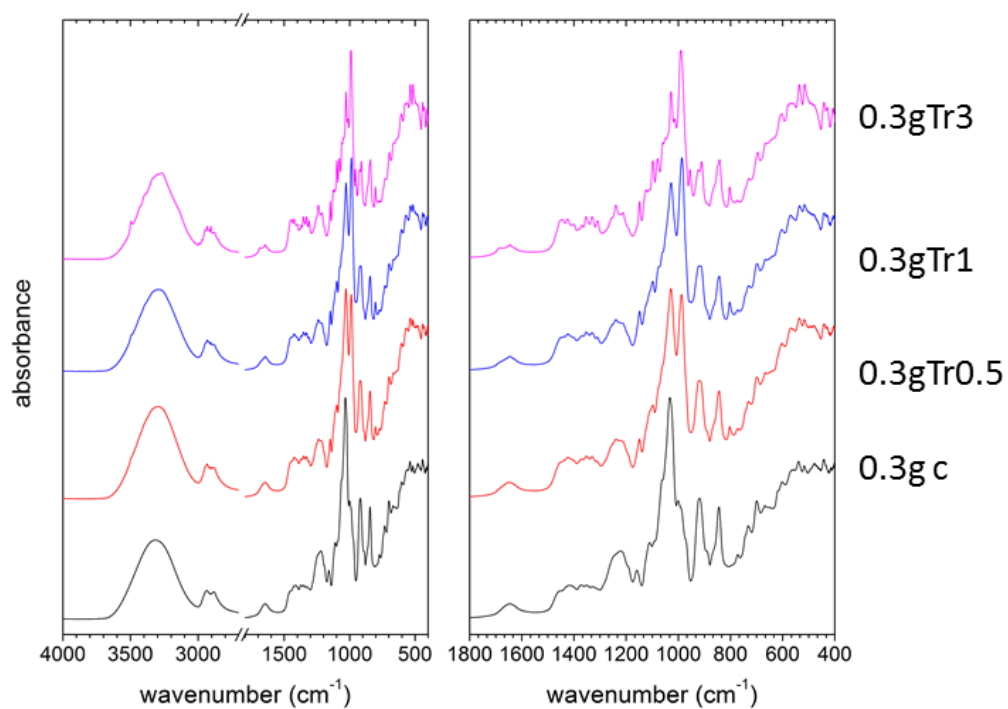

**Figure S4.** ATR FTIR spectra of the trehalose-containing carrageenan films without addition of essential oil (0.3 g of carrageenan)

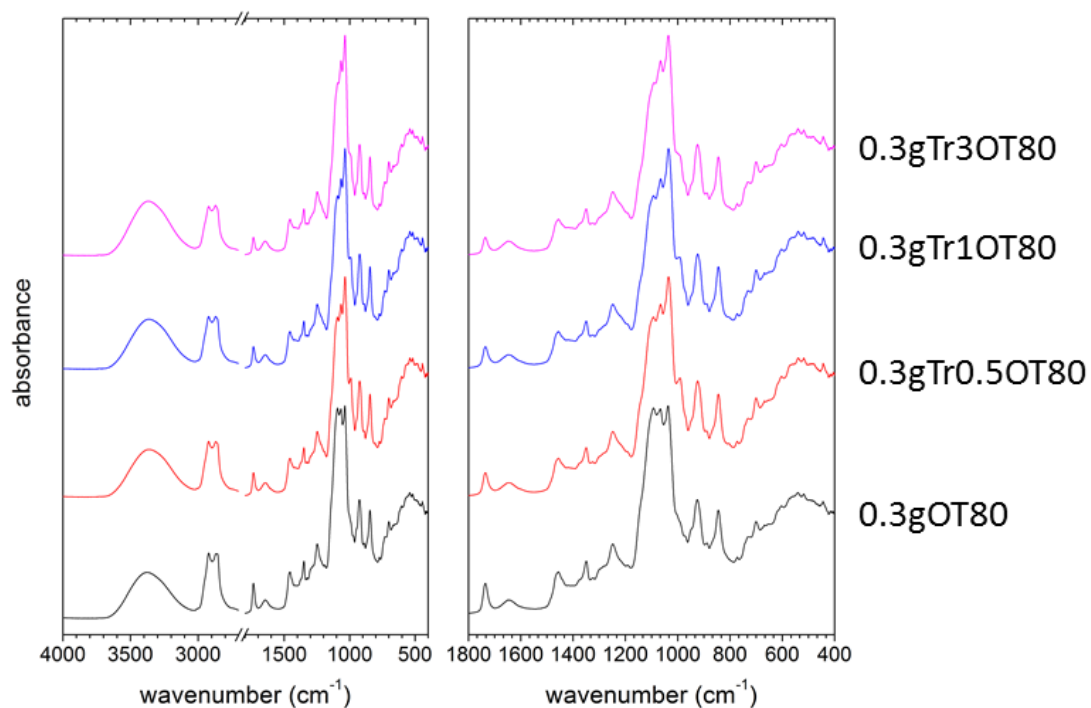

**Figure S5.** ATR FTIR spectra of the trehalose-containing carrageenan films with the addition of essential oil (0.3 g of carrageenan, Tween 80)

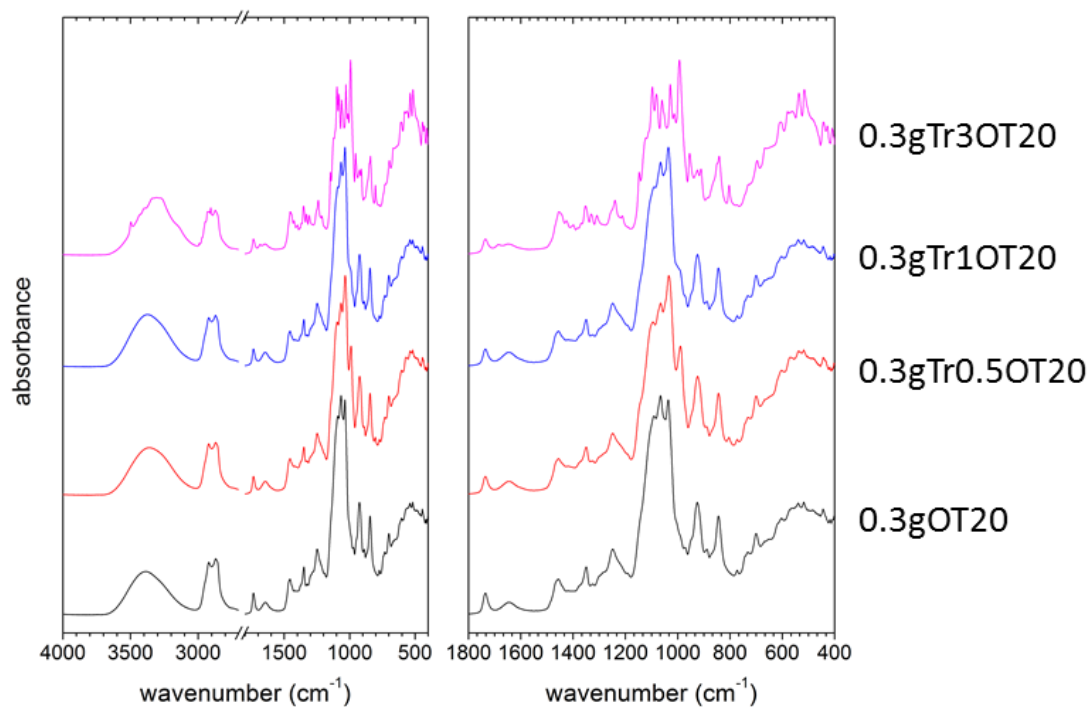

**Figure S6.** ATR FTIR spectra of the trehalose-containing carrageenan films with the addition of essential oil (0.3 g of carrageenan, Tween 20)

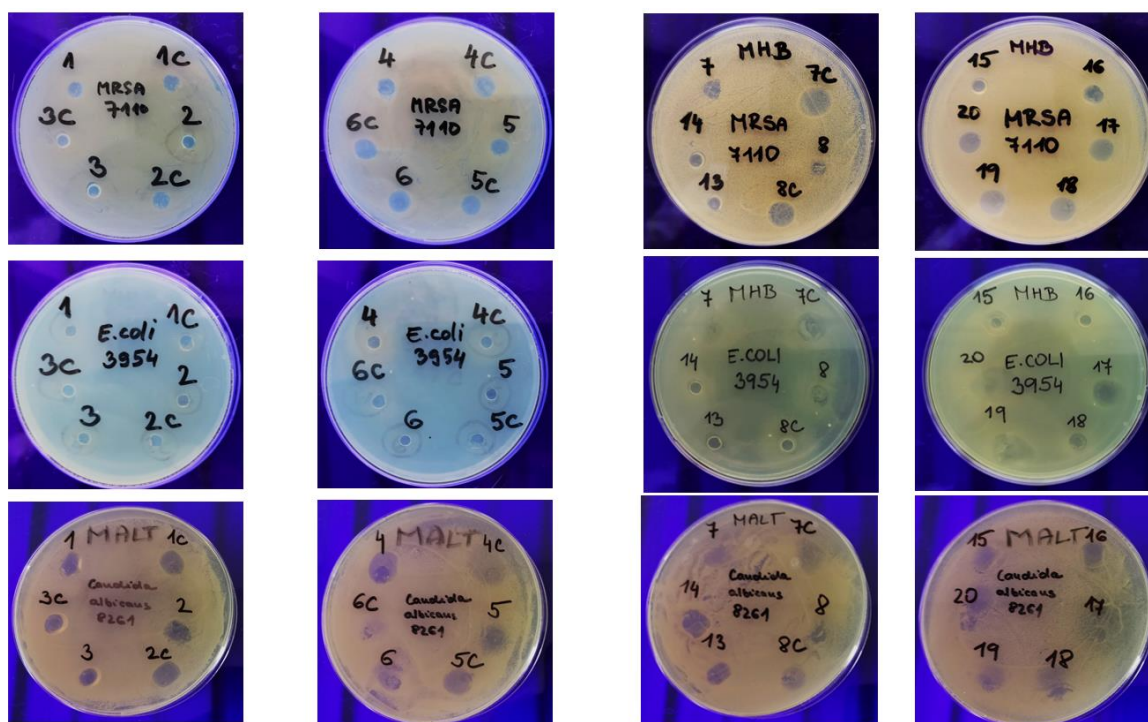

**Figure S7.** The complete results of antimicrobial activity of prepared films
